# Supplementary material for: Urban Public Food Procurement in Kiambu and Machakos Counties as a Driver of Food and Nutrition Security and Sustainability: A Literature Review and Case Studies
Source: MDPI journal article supplement (doi:10.3390/su14063341), 2022-03-12
Supplement: s1 [file s1]

# Supplemental Material: Articles included in literature review for paper “Urban public food procurement in Kiambu and Machakos Counties as a driver of food and nutrition security and sustainability: a literature review and case studies”

1. Transform Nutrition. “Ann Wawira Njiru – Kenya,” 2013. <https://archive.ids.ac.uk/tn/what-we-do/nutrition-champions/ann-wawira-njiru-kenya/index.html>.
2. “County Government of Kiambu County Annual Development Plan 2021-2022.” County Government of Kiambu, 2020. [https://kiambu.go.ke/wp-content/uploads/2020/08/CADP\\_2021.22\\_Draft.pdf](https://kiambu.go.ke/wp-content/uploads/2020/08/CADP_2021.22_Draft.pdf).
3. “County Integrated Development Plan 2018-2022.” County Government of Kiambu, 2018.
4. Machakos County. “Covid-19 Donations,” 2020. <https://machakosgovernment.co.ke/covid-19-donations/>.
5. Capital News. “Feeding Programs See Surge in Kiambu School Enrolment.” November 26, 2014. 1628386437. eLibrary; ProQuest Central. <https://www.capitalfm.co.ke/news/2014/11/feeding-programs-see-surge-in-kiambu-school-enrolment/>.
6. Food 4 Education. “Food4Education - Feeding The Future,” 2021. <https://food4education.org/>.
7. “Framework Contract for Supply and Delivery of Food and Ration.” Government of Machakos County Ministry of Health and Emergency Services, 2020. <https://machakosgovernment.co.ke/download/framework-contract-for-supply-and-delivery-of-food-and-ration/>.
8. The Express Tribune. “Free Lunch: Govt to Initiate School Feeding Programme,” June 19, 2015. <http://tribune.com.pk/story/906572/free-lunch-govt-to-initiate-school-feeding-programme>.
9. Kahongeh, James. “Her Initiative Feeds 3,000 School Children Daily.” Daily Nation. May 31, 2019. <http://search.proquest.com/internationalnews1/docview/2232326372/citation/277ADFC17CE246F0PQ/1>.
10. Kavila, Wambua. “Kenya: Sh17 Million Given to Schools for Feeding.” The Star, 2011. <https://allafrica.com/stories/201106130119.html>.
11. Kavila, Wambua. “Kenya: Sh250 Million to Fight Machakos Famine.” allAfrica.com, March 12, 2014. <https://allafrica.com/stories/201403120490.html>.
12. “Kiambu County Launches Five-Year Nutrition Action Plan.” Nutrition International, 2021. <https://www.nutrition-intl.org/news/all-news/kiambu-county-launches-five-year-nutrition-action-plan/>.
13. Kiilu, Redempta. “Status of School Feeding Programme Policy Initiatives in Primary Schools in Machakos County, Kenya.” African Educational Research Journal 7 (February 28, 2019): 33–39. <https://doi.org/10.30918/AERJ.71.18.107>.
14. “Machakos Annual Development Plan 2021-2022.” County Government of Machakos, 2020. [https://drive.google.com/file/d/1v\\_bXiukaTngZ9rG7wgWoTLM\\_mBZv5V33/view?usp=embed\\_facebook](https://drive.google.com/file/d/1v_bXiukaTngZ9rG7wgWoTLM_mBZv5V33/view?usp=embed_facebook).
15. “Machakos Annual Progress Report County Government of Machakos 2018/2019.” County Government of Machakos, 2019. <https://machakosgovernment.co.ke/download/machakos-annual-progress-report-2018-2019/>.
16. “Machakos County Assembly Strategic Plan 2018-2023.” County Assembly of Machakos, 2018. <https://drive.google.com/file/d/1GV8Qe4n3rJG8f5wRU20luSAWUrtPz8lb/view>.
17. Mwangangi, J. “Machakos County Assembly Approves Free School Milk Program.” Mauvoo, July 11, 2019. <https://mauvoo.com/machakos-county-assembly-approves-free-school-milk/>.
18. Ndung’u Wa Gathua. “County Government Lauded for Introducing Feeding Programme in ECDEs.” Hivisasa, 2016. <https://hivisasa.com/posts/county-government-lauded-for-introducing-feeding-programme-in-ecdes>.
19. Njenga, Stanley. “ECDE Classrooms for Kiambu Subcounties.” The Star, 2016. <https://www.the-star.co.ke/counties/central/2016-01-26-ecde-classrooms-for-kiambu-subcounties/>.
20. Njenga, Stanley. “Kenya: Food Project Woos Nursery Children.” allAfrica.com, November 27, 2014. <https://allafrica.com/stories/201411270327.html>.
21. Ongaro, Lawrence. “Serikali Ya Kaunti Ya Kiambu Yapata Mbinu Ya Kugawa Chakula Kwa Walioathiriwa Zaidi Kiuchumi Na Janga La Covid-19 (Kiambu County Government Finds A Way To Distribute Food To Those Most Affected By The Covid-19 Epidemic).” Taifa Leo (blog), 2020. <https://taifaleo.nation.co.ke/?p=51688>.
22. Wainaina, Eric. “Kenya: Cry of Patients in Kiambu as They Share Beds, Rely on Relatives for Food.” allAfrica.com, July 31, 2018. <https://allafrica.com/stories/201807310198.html>.
23. Wainaina, James. “Kenya: Food, Medicine for Patients.” allAfrica.com, February 7, 2014. <https://allafrica.com/stories/201402070967.html>.
